# Supplementary material
Source: PubMed Central journal article supplement (PMC3255638)
Supplement: supp_78.1.103_AEM-AEM06195-11-s01.pdf [file supp_78.1.103_AEM-AEM06195-11-s01.pdf]

## Supplemental Materials

### Supplemental figure legends

Supplemental Figure 1. Inserts in four isolated plasmids (MST5-4, MST5-5, MST15-13 and MST15-34) conferring RNA tolerance.

Open box, ORF positions; Blank regions within boxes, introns.

Supplemental Figure 2. Deduced amino acid sequence alignment of PBG-D from *A. nidulans* (A.n.PBG-D), *S. cerevisiae* (S.c.PBG-D) and *E. coli* (E.c.PBG-D).

Sequences were aligned using ClustalW. Black and white boxes, identical and similar amino acids, respectively.

Supplemental Figure 3. Southern blot analysis of ALC and  $\Delta fhb$  gene disruptants. Restriction enzymes used to digest the genomic DNAs from parent and mutant strains are indicated. PalcA indicates the gene promoter of *alcA*. Black bars represent position of hybridization probes. P, parental strains; R, recombinant strains. Predicted size shifts are indicated in corresponding Southern blots.

Supplemental Figure 4. Growth of WT and ALC strains.

Colonies appeared on MM agar medium (pH 5.5) containing 25 mM NaNO<sub>2</sub> after incubating WT and ALC conidia at 37°C for 48 h. Proline (Pro), methionine (Met) and ergosterol (Erg) were added to the medium at final concentrations of 5 mM, 10 mM, 10 mM, and 10 µg mL<sup>-1</sup>, respectively.

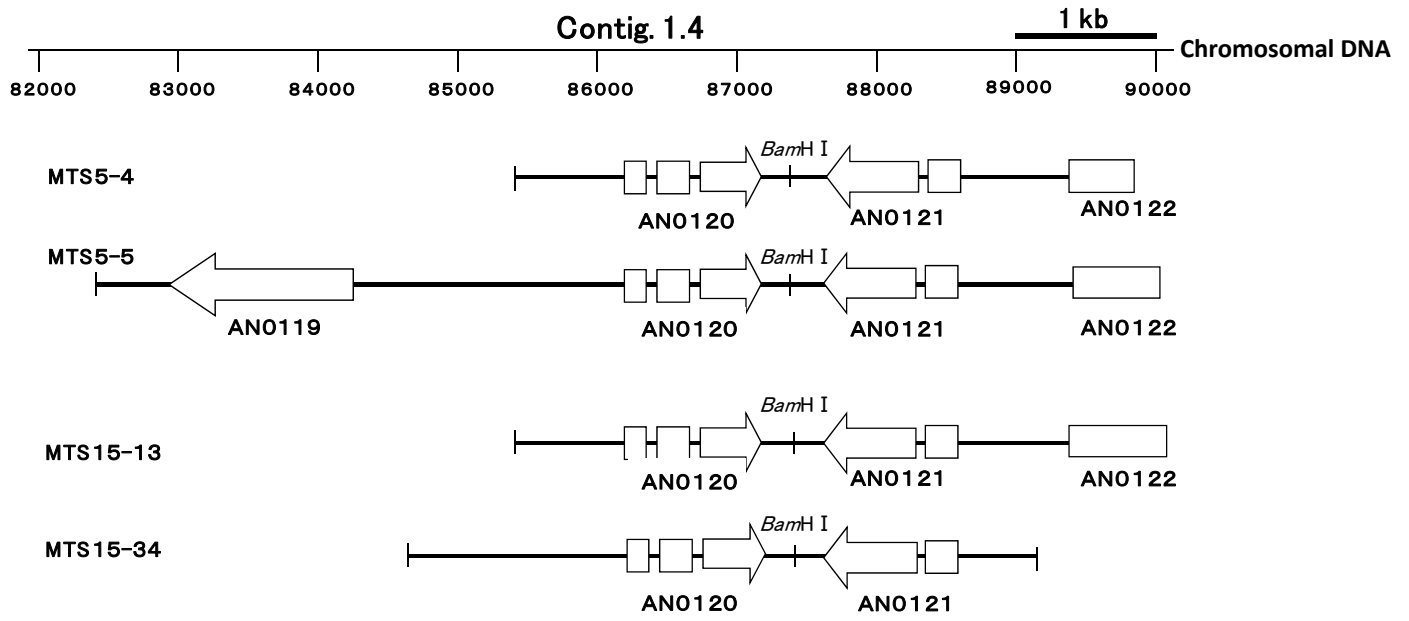

**Fig. S1**

```

A.n.PBG-D .....
S.c.PBG-D MGPETLHIGGRKSKLAVIQSNHVLKLIIEEKYPDYDCKVFTLQTLGDQIQFKPLYSGGKALWTKLEDHL
E.c.PBG-D MLDNVLRIATRQSPLALWQAHYVKDKLMASHPLVVELVPMVTRGDVILDTPLAKVGGKGLFVKELEVAL

          1      10      20      30      40
A.n.PBG-D .....LPTSCTLGPMMKREDSRDGLVIKKGLPNMSSLAEMPAGSVVGTSSIRRT
S.c.PBG-D YHDDPSKKLDDLIVHSLKDMPTLLPEGFELGGITKRVDTDCLVMPFYSAYKSLDDLPDGGIVGTSSVRRS
E.c.PBG-D LEN....RADIAVHSMKDVPVEFPQGLGLLVTICEREDPRDAFVSNN...YDSLDALLPAGSVIVGTSSLRRO

          50      60      70      80      90      100      110
A.n.PBG-D AQLARKYPHLKVMDVRGNIGTRLAKLDAEDSEYTCLLLAAAAGLRLGLGDRIYQYLDSRNAGMLYAVGQG
S.c.PBG-D AQLKRKYPHLKFESVRGNIQTRLQKLDDPKSEYQCIILASAGLMRMGLENRITQRFHS..DTMYHAVGQG
E.c.PBG-D CQLAERRPDLIIRSLRGNVGTRLSKLDNGE..YDAILAVAGLKRLGLESRIRAALPP..EISLPAVGQG

          120      130      140      150      160      170      180
A.n.PBG-D ALGIEIRKGDKAMEDILNTIGHKETTFACLAERSLLRTLEGCSAPLGVETEWIQDTNGSSKLRMRSVV
S.c.PBG-D ALGIEIRKGDTKMMKILDEICDLNATICCLSERALMRTLEGCSVPIGVESKYNEETK...KLLLKAIV
E.c.PBG-D AVGIECRLDDSRTRELLAALNHHETALRVTAERAMNTRLEGCQVPIG...SYAELIDG..EIWLRALVG

          190      200      210      220      230      240
A.n.PBG-D SVDGSEHAEVEIDGTVDSP.QSAEFGVTVAKALVNEGAGKILSEIQQNRQLKVPVSEST
S.c.PBG-D DVEGTEAVEDEIEMLIENVKEDSMACGKILAERMIADGAKKILDEINLDR.IK.....
E.c.PBG-D APDGSQTIRGERRG...APQDAEOMGISLAELLNNGAREILAEVYNGDAPA.....

```

Fig. S2

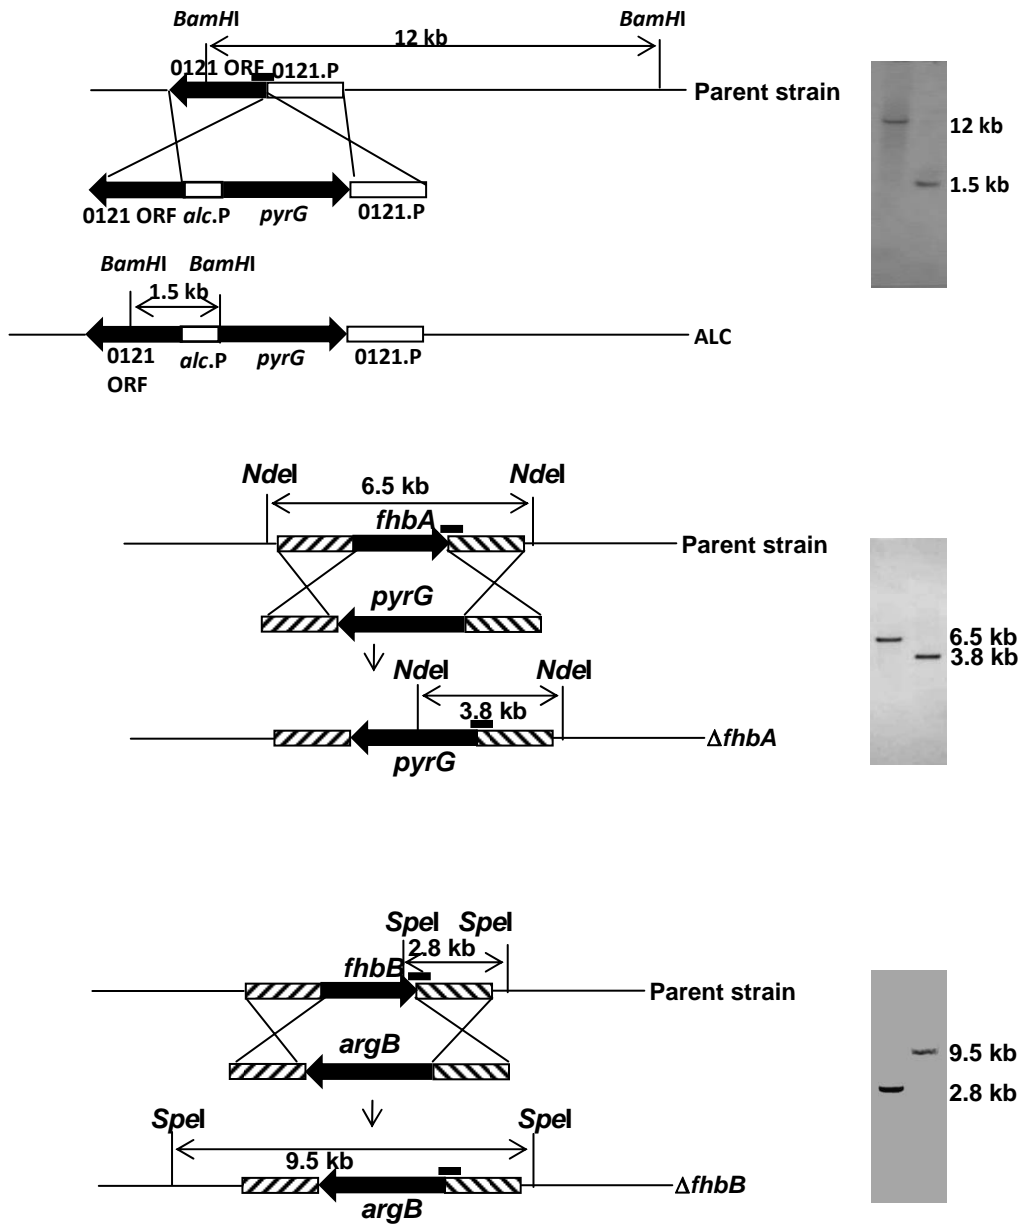

Fig. S3

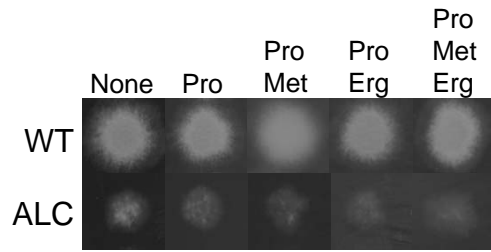

**Fig. S4**

**Supplemental Table S1. Primers used in this study.**

| <b>Primer name</b>            | <b>Sequence (5'→3')</b>                      | <b>Restriction enzyme</b> |
|-------------------------------|----------------------------------------------|---------------------------|
| <i>pyrG</i> -F                | TAT <u>CCCGGG</u> GAATTTCGATACCTGTCGAAAG     | <i>Sma</i> I              |
| <i>pyrG</i> -R                | CATAC <u>CCCGGG</u> TCAGTGCTTGTCTACCAG       | <i>Sma</i> I              |
| <i>argB</i> -F                | CCGG <u>GGATCC</u> AAGCTTTATTTTCGCGGTTTTTTGG | <i>Bam</i> HI             |
| <i>argB</i> -R                | ATTAGCATG <u>CGT</u> CGACCTACAGCCATTGC       | <i>Sph</i> I              |
| $\Delta$ <i>hemC</i> -1       | GG <u>CTGCAG</u> CGGGATTTCATGCGATA           | <i>Pst</i> I              |
| $\Delta$ <i>hemC</i> -2       | GGGATAT <u>CGTT</u> GAGAGGGCGTTTCT           | <i>Eco</i> RV             |
| $\Delta$ <i>hemC</i> -3       | GG <u>CCGCGG</u> GGCAGCCTTCGATTTTAA          | <i>Sac</i> II             |
| $\Delta$ <i>hemC</i> -4       | GGGCGGCC <u>CGCT</u> CTTGGGTTTGCTTCTT        | <i>Not</i> I              |
| $\Delta$ <i>fhbA</i> -1       | GGGATAT <u>CA</u> TCTCCGTCACGAAGAAA          | <i>Eco</i> RV             |
| $\Delta$ <i>fhbA</i> -2       | GCTGCAGCAACCTTATCAGCG                        | <i>Pst</i> I              |
| $\Delta$ <i>fhbA</i> -3       | CCTCTAG <u>AT</u> TTTCATCCACGGCGC            | <i>Xba</i> I              |
| $\Delta$ <i>fhbA</i> -4       | GGGCGGCC <u>CG</u> CGGTCGCAAACAAGTTGT        | <i>Not</i> I              |
| $\Delta$ <i>fhbB</i> -1       | CTCGGA <u>ATT</u> CCCAGGAACAGATTAAAACC       | <i>Eco</i> RI             |
| $\Delta$ <i>fhbB</i> -2       | TGACTG <u>TCGAC</u> ATTAATCAGCGGAGCTGGGC     | <i>Sal</i> I              |
| $\Delta$ <i>fhbB</i> -3       | TAGAG <u>CA</u> TGCGCCCTTGGTGATTTTGTGC       | <i>Sph</i> I              |
| $\Delta$ <i>fhbB</i> -4       | GGCC <u>CTGCAG</u> TGTTCCGAATTACCTCGAAC      | <i>Pst</i> I              |
| <i>alcA</i> -F                | GGGCGGCC <u>CG</u> GGGGCGGAAATTGACA          | <i>Not</i> I              |
| <i>alcA</i> -R                | GCGGGGTTTGAGTTGTCATTTTGAGGCGAGGTGATAGGAT     |                           |
| <i>hemC</i> -F                | ATGACA <u>ACTCAA</u> ACCCCGC                 |                           |
| <i>hemC</i> -R                | GG <u>CCGCGG</u> AAGAAACAAATGACGTTGTC        | <i>Sac</i> II             |
| ALC-probe-F                   | TTCTACAGCGGAACCGCCTC                         |                           |
| ALC-probe-R                   | AAGGTTGTCTCCTTATGACC                         |                           |
| $\Delta$ <i>fhbA</i> -probe-F | GAGCTGTCCATCACGGGAGC                         |                           |
| $\Delta$ <i>fhbA</i> -probe-R | GTTGATCGGTCGGTTCCCAC                         |                           |
| $\Delta$ <i>fhbB</i> -probe-F | CAGCCGCGACAGTACAGTCTG                        |                           |
| $\Delta$ <i>fhbB</i> -probe-R | TCAACGGCCCCGCTTCGGCG                         |                           |
| q-RT- <i>hemC</i> -F          | CCAGTACTTGGA <u>CTCA</u> AGGAAC              |                           |
| q-RT- <i>hemC</i> -R          | CTCAGCATGTTCACTACCATC                        |                           |
| q-RT- <i>fhbA</i> -F          | CATGGCACCACCATCACCAAGG                       |                           |
| q-RT- <i>fhbA</i> -R          | GGTTGTCGATATAGCTCGCG                         |                           |
| q-RT- <i>fhbB</i> -F          | TATGCGACCAGTGCTCTC                           |                           |
| q-RT- <i>fhbB</i> -R          | CGCTTGGTGCGAGGAGTTG                          |                           |
| q-RT- <i>niiA</i> -F          | AACAGGCGGCAGAAGATCG                          |                           |
| q-RT- <i>niiA</i> -R          | TGCGGTGCTCGAAGTACGAC                         |                           |
| q-RT- <i>hemC</i> -F          | CCAGTACTTGGA <u>CTCA</u> AGGAAC              |                           |
| q-RT- <i>hemC</i> -R          | CTCAGCATGTTCACTACCATC                        |                           |
| q-RT- <i>actA</i> -F          | GAAGTCCTACGA <u>ACTGC</u> CTGATG             |                           |
| q-RT- <i>actA</i> -R          | AAGAACGCTGGGCTGGAA                           |                           |

Sequences corresponding to restriction enzymes are underlined.
